# Supplementary material for: Effects of surface chemistry on the mechanochemical decomposition of tricresyl phosphate
Source: Royal Society of Chemistry journal article supplement (doi:10.1039/d3cp05320b), 2023-11-30
Supplement: d3cp05320b1.pdf [file d3cp05320b1.pdf]

## Electronic Supplementary Information for: Mechanochemical Decomposition of Tricresyl Phosphate between Sliding Ferrous Surfaces

Egheosa Ogbomo<sup>1,2,3</sup>, Fakhrol H. Bhuiyan<sup>4</sup>, Carlos Ayestarán Latore<sup>1,2,3</sup>, Ashlie Martini<sup>4</sup>, and James P. Ewen<sup>1,2,3</sup>

<sup>1</sup>Department of Mechanical Engineering, Imperial College London, South Kensington Campus, SW7 2AZ London, U.K.

<sup>2</sup>Institute of Molecular Science and Engineering, Imperial College London, South Kensington Campus, SW7 2AZ London, U.K.

<sup>3</sup>The Thomas Young Centre, Imperial College London, South Kensington Campus, SW7 2AZ London, U.K.

<sup>4</sup>Department of Mechanical Engineering, University of California-Merced, 5200 N. Lake Road, Merced 95343 CA, U.S.A.

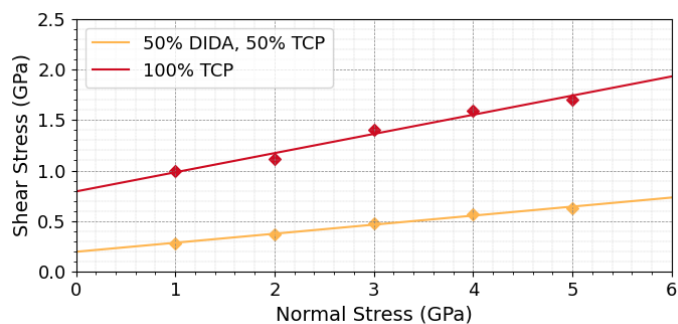

**Figure S1** Change in shear stress with normal stress for 100% TCP and 50% TCP, 50% DIDA at 600K and 1-5 GPa. Friction coefficient,  $\mu = 0.18$  (100% TCP),  $\mu = 0.17$  (50% TCP, 50% DIDA) and Derjaguin offset,  $\tau_0 = 0.79$  GPa (100% TCP),  $\tau_0 = 0.20$  GPa (50% TCP, 50% DIDA).

| Temperature  | Stiffness (GPa) |       |       |       |       |       |       |
|--------------|-----------------|-------|-------|-------|-------|-------|-------|
|              | 300 K           | 400 K | 500 K | 600 K | 700 K | 800 K | 900 K |
| Iron         | 206             | 206   | 202   | 200   | 200   | 199   | 196   |
| Iron Carbide | 200             | 200   | 201   | 198   | 200   | 196   | 181   |
| Iron Oxide   | 220             | 216   | 210   | 209   | 206   | 199   | 196   |

**Table S1** Elastic constant ( $C_{33}$ ) values for  $\alpha$ -Fe(110),  $\text{Fe}_3\text{C}(010)$ , and  $\text{Fe}_3\text{O}_4(001)$  slabs with ReaxFF.

| Temperature  | Friction Coefficient ( $\mu$ ) |       |       |       |       |       |
|--------------|--------------------------------|-------|-------|-------|-------|-------|
|              | 400 K                          | 500 K | 600 K | 700 K | 800 K | 900 K |
| Iron         | 0.35                           | 0.22  | 0.18  | 0.25  | 0.17  | 0.16  |
| Iron Carbide | 0.28                           | 0.31  | 0.23  | 0.24  | 0.19  | 0.20  |
| Iron Oxide   | 0.24                           | 0.24  | 0.23  | 0.23  | 0.26  | 0.27  |

**Table S2** Friction Coefficient,  $\mu$ , for TCP between  $\alpha$ -Fe(110),  $\text{Fe}_3\text{C}(010)$ , and  $\text{Fe}_3\text{O}_4(001)$  surfaces at different temperatures.

| Temperature  | Derjaguin Offset |       |       |       |       |       |
|--------------|------------------|-------|-------|-------|-------|-------|
|              | 400 K            | 500 K | 600 K | 700 K | 800 K | 900 K |
| Iron         | 0.28             | 0.72  | 0.79  | 0.53  | 0.75  | 0.79  |
| Iron Carbide | 0.38             | 0.31  | 0.66  | 0.57  | 0.73  | 0.77  |
| Iron Oxide   | 0.26             | 0.27  | 0.31  | 0.32  | 0.34  | 0.34  |

**Table S3** Derjaguin offset for TCP between  $\alpha$ -Fe(110),  $\text{Fe}_3\text{C}(010)$ , and  $\text{Fe}_3\text{O}_4(001)$  surfaces at different temperatures.

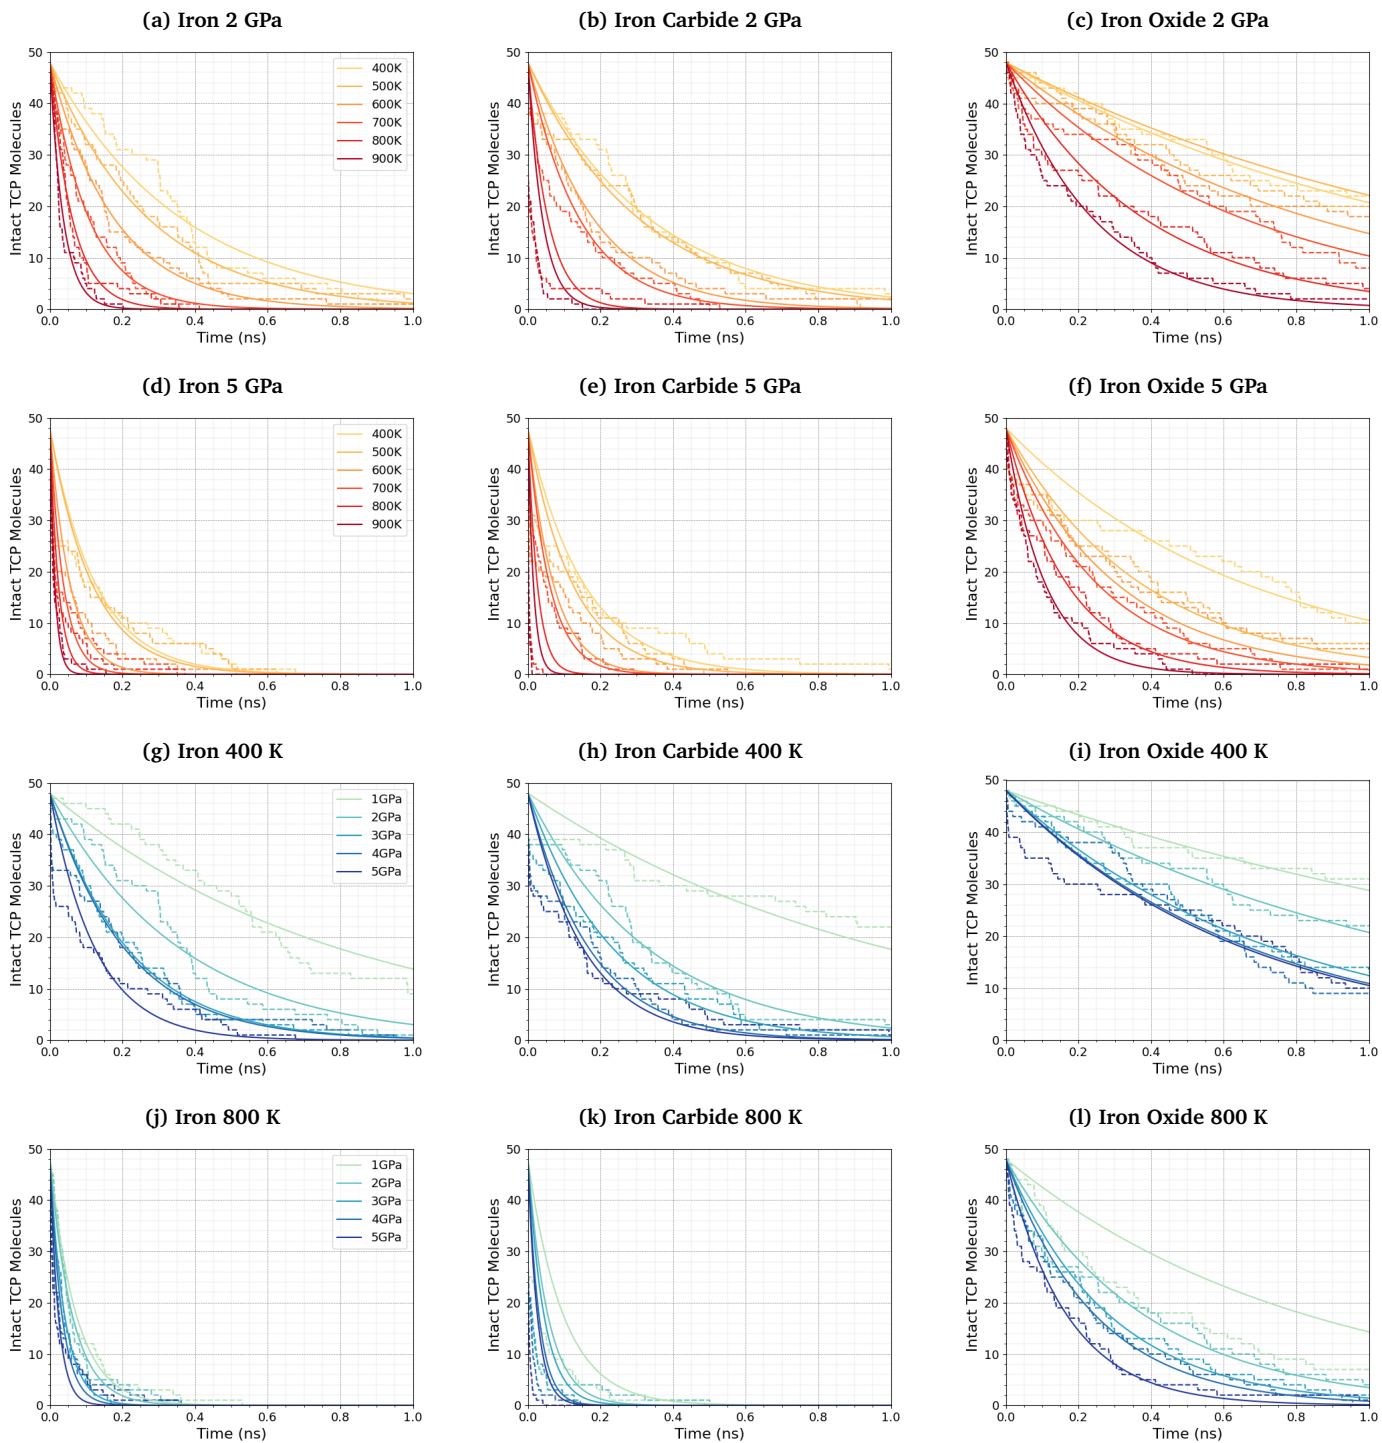

**Figure S2** Variation in TCP dissociation rates for  $\alpha$ -Fe(110),  $\text{Fe}_3\text{C}(010)$ , and  $\text{Fe}_3\text{O}_4(001)$  under various conditions.

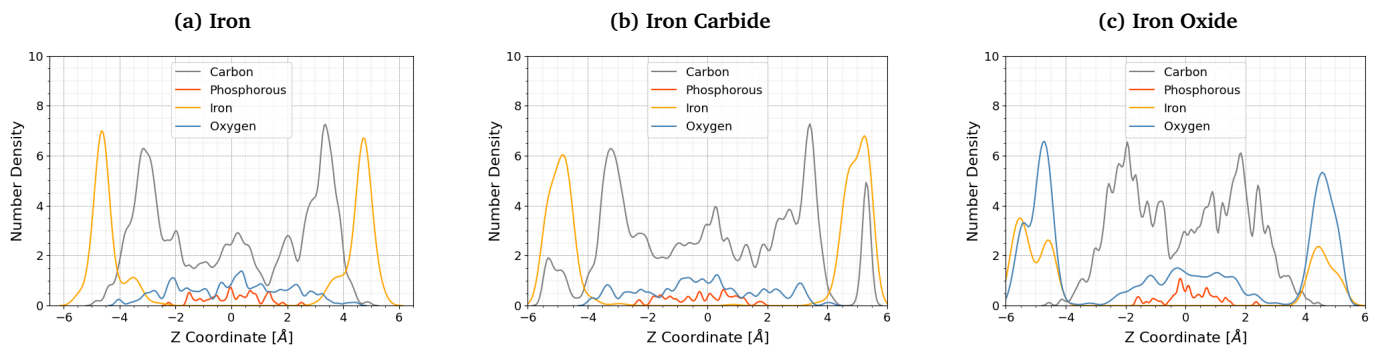

**Figure S3** Number density profiles for the Fe, C, O, and P atoms in the a)  $\alpha$ -Fe(110), b)  $\text{Fe}_3\text{C}(010)$ , and c)  $\text{Fe}_3\text{O}_4(001)$  systems at 500 K and 3 GPa

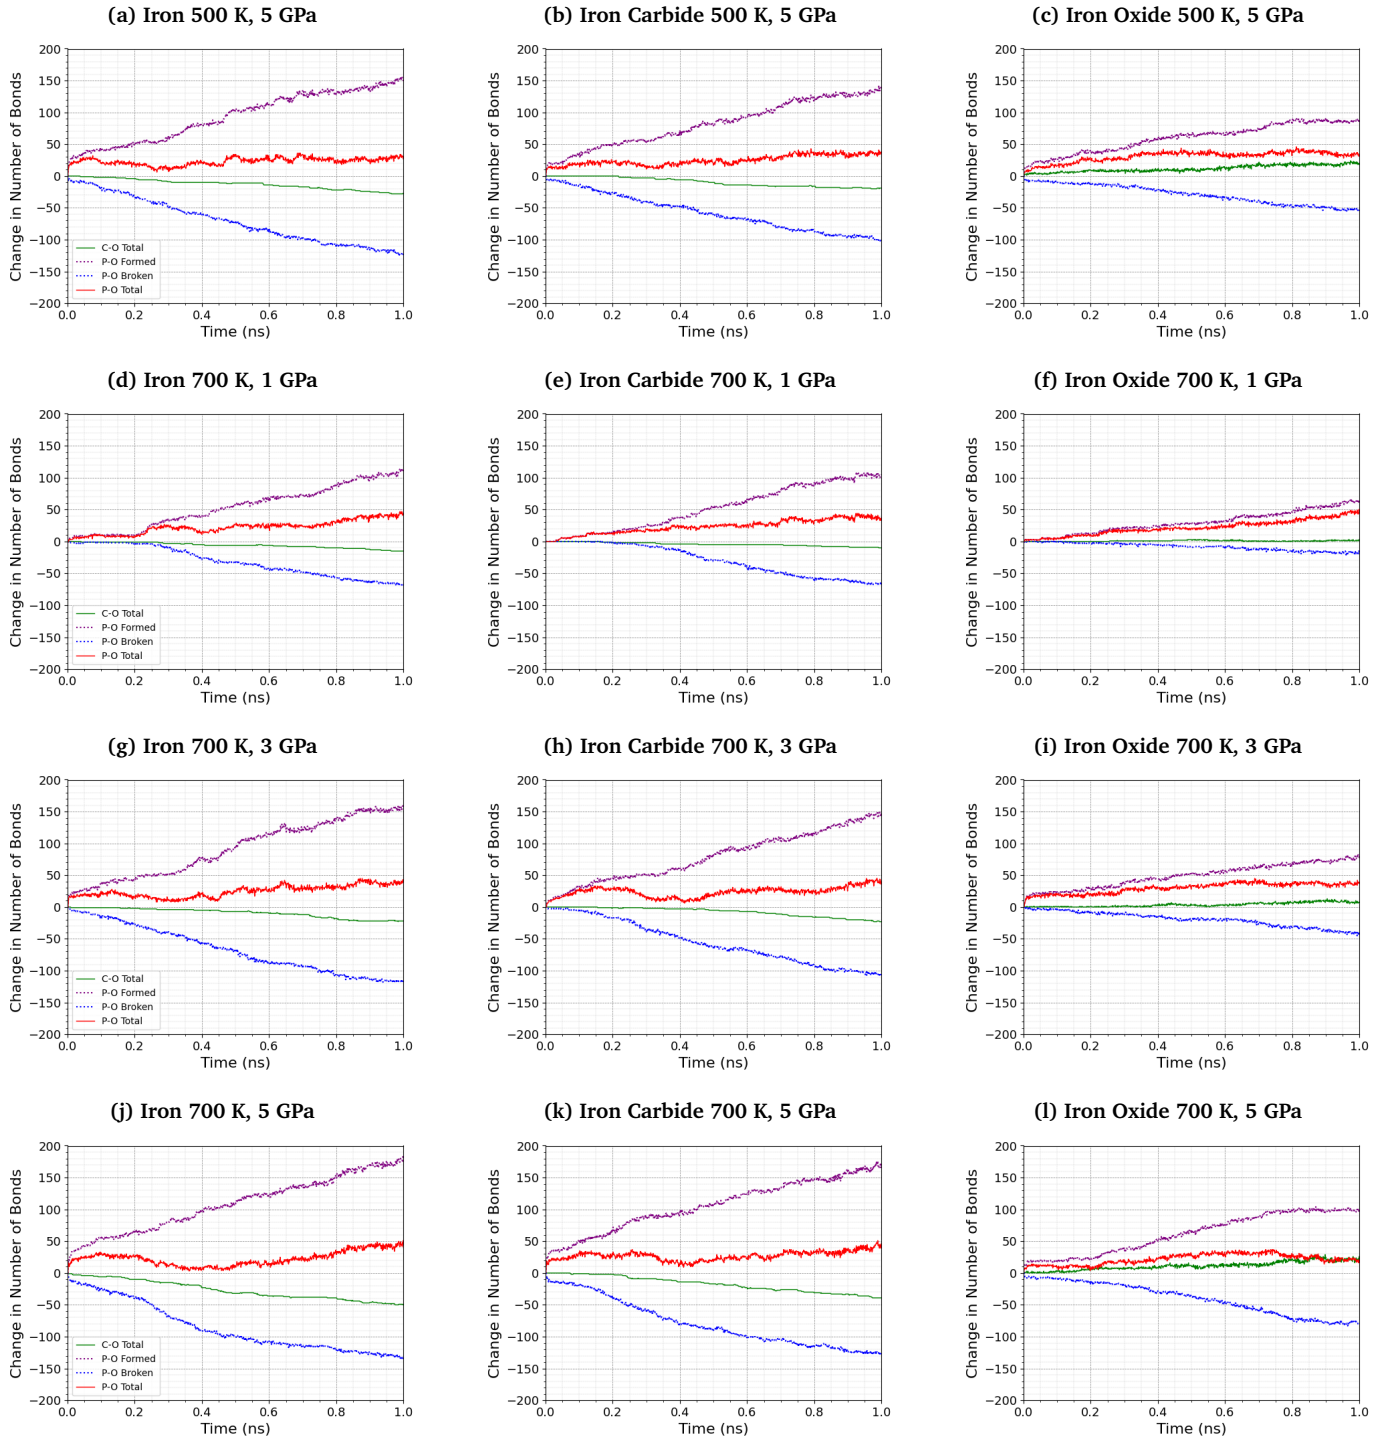

**Figure S4** Change in the number of P-O and C-O bonds compared to TCP, for  $\alpha$ -Fe(110),  $\text{Fe}_3\text{C}(010)$ , and  $\text{Fe}_3\text{O}_4(001)$  under various conditions. Solid lines represent total change, dashed lines show bond formation and dotted lines show bond cleavage.

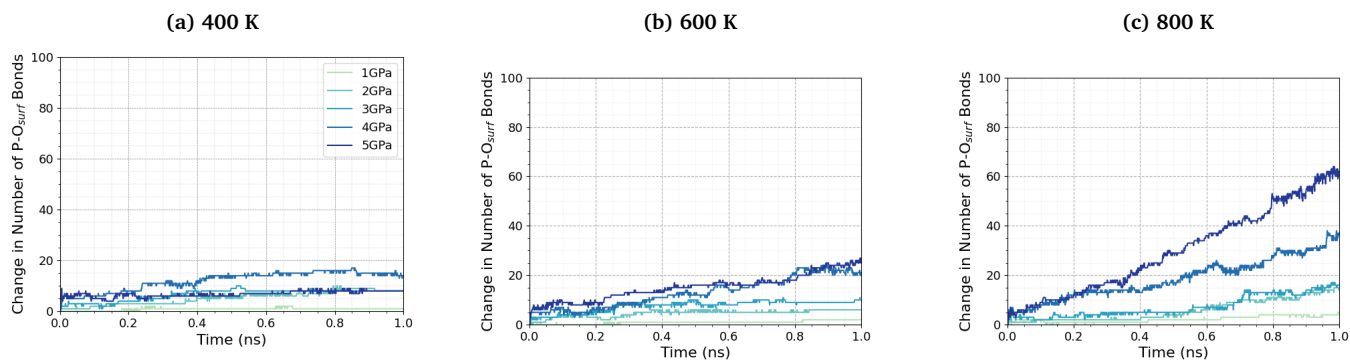

**Figure S5** Comparison of  $P-O_{surf}$  bonds formed in the  $Fe_3O_4(100)$  system at a) 400 K, b) 600 K, and c) 800 K

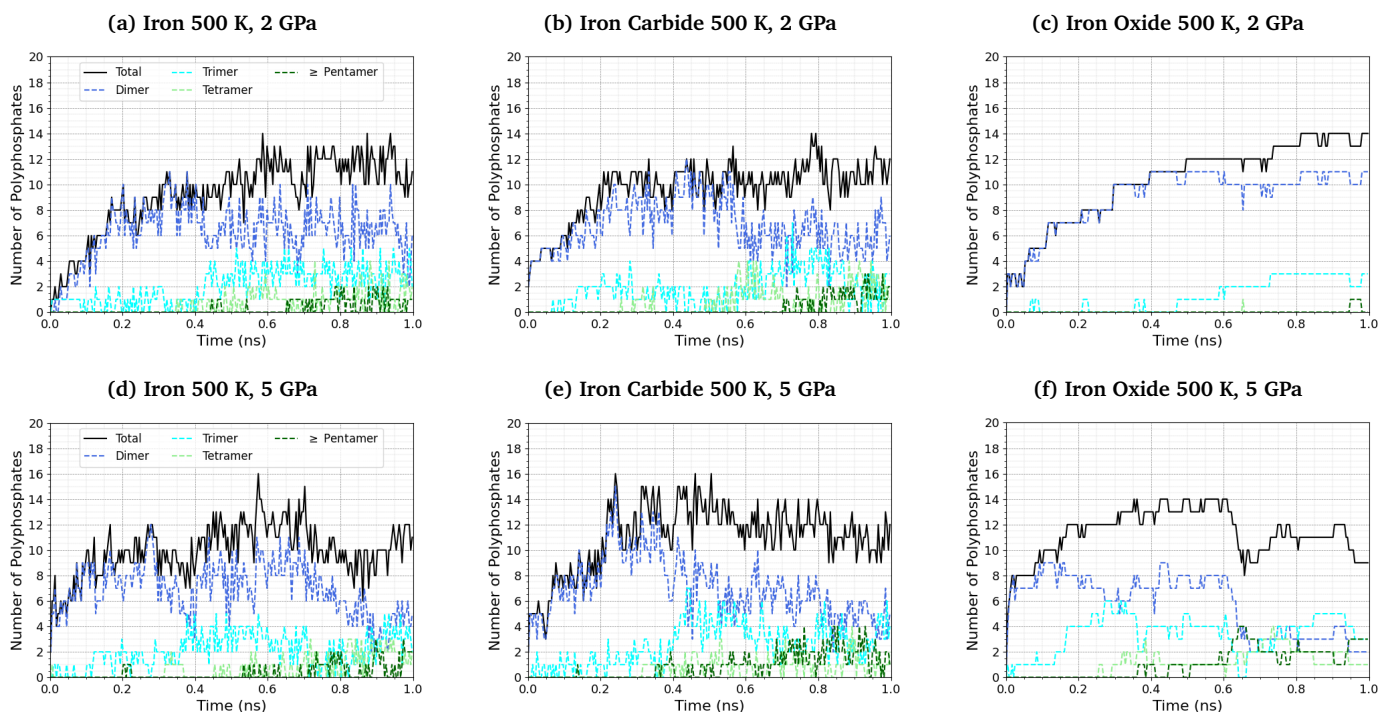

**Figure S6** Change in the number of polyphosphate chains with sliding time for a)  $\alpha$ -Fe(110), b)  $Fe_3C(010)$  and c)  $Fe_3O_4(100)$  systems.

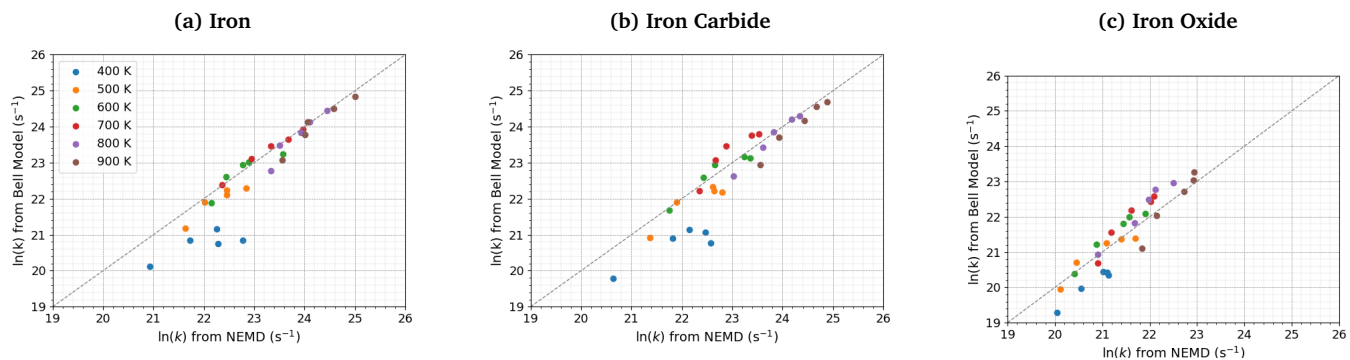

**Figure S7** Comparison of the logarithm of the reaction rates calculated from the NEMD simulations and those predicted using Equation 1.  $R^2 = 0.91$  for  $\alpha$ -Fe(110),  $R^2 = 0.88$  for  $Fe_3C(010)$ , and  $R^2 = 0.87$  for  $Fe_3O_4(001)$ .

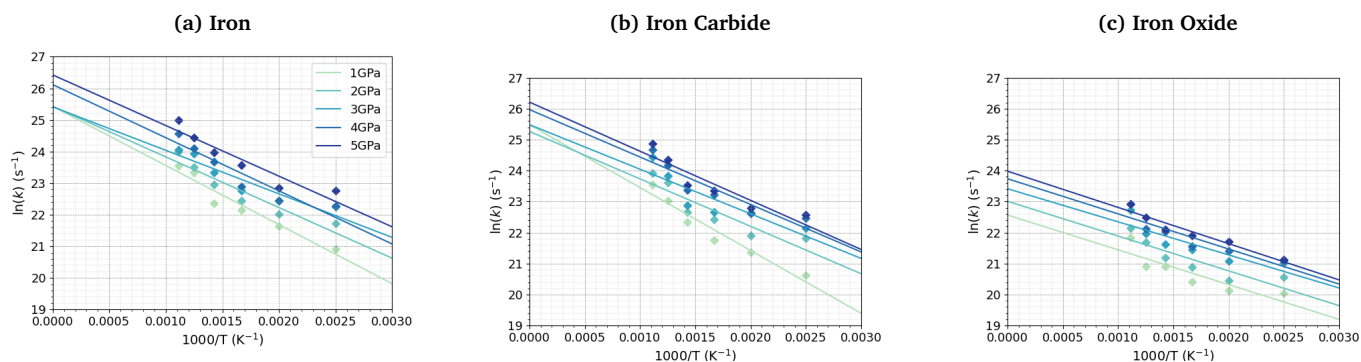

**Figure S8** Arrhenius plots of  $\ln(k)$  versus  $1000/T$  for a)  $\alpha$ -Fe(110), b)  $\text{Fe}_3\text{C}(010)$ , and c)  $\text{Fe}_3\text{O}_4(001)$  obtained at different pressures. From Equation 1, the intercept of the lines gives  $A$  and gradient gives  $E_a$ .

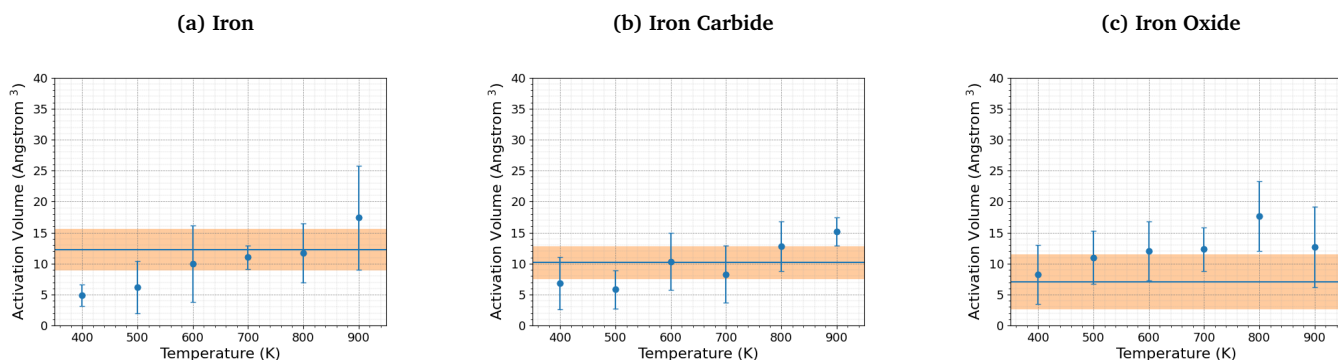

**Figure S9** Temperature dependence of  $\Delta V^*$  for a)  $\alpha$ -Fe(110), b)  $\text{Fe}_3\text{C}(010)$ , and c)  $\text{Fe}_3\text{O}_4(001)$ . Blue points are from the 2D fits, orange are from the 3D fits. Vertical bars indicate 95 % confidence intervals.

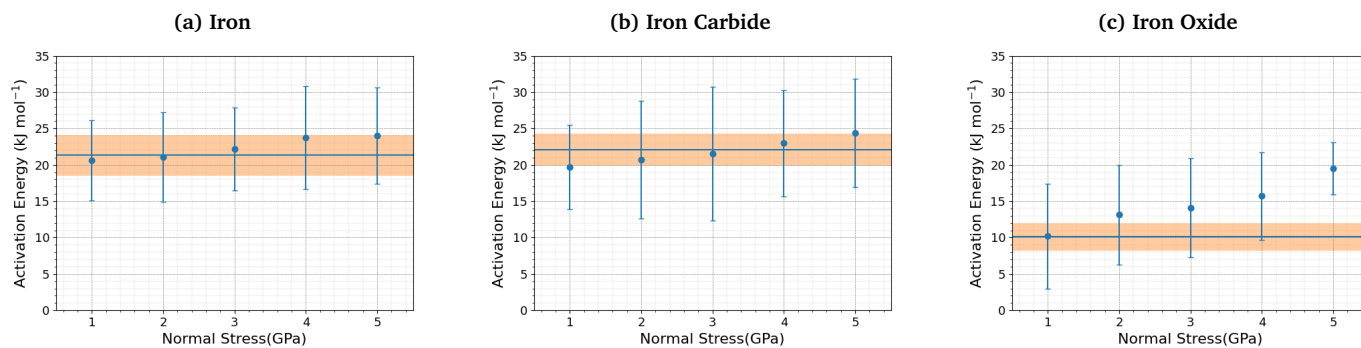

**Figure S10** Pressure dependence of  $E_a$  for a)  $\alpha$ -Fe(110), b)  $\text{Fe}_3\text{C}(010)$ , and c)  $\text{Fe}_3\text{O}_4(001)$ . Blue points are from the 2D fits, orange are from the 3D fits. Vertical bars indicate 95 % confidence intervals.

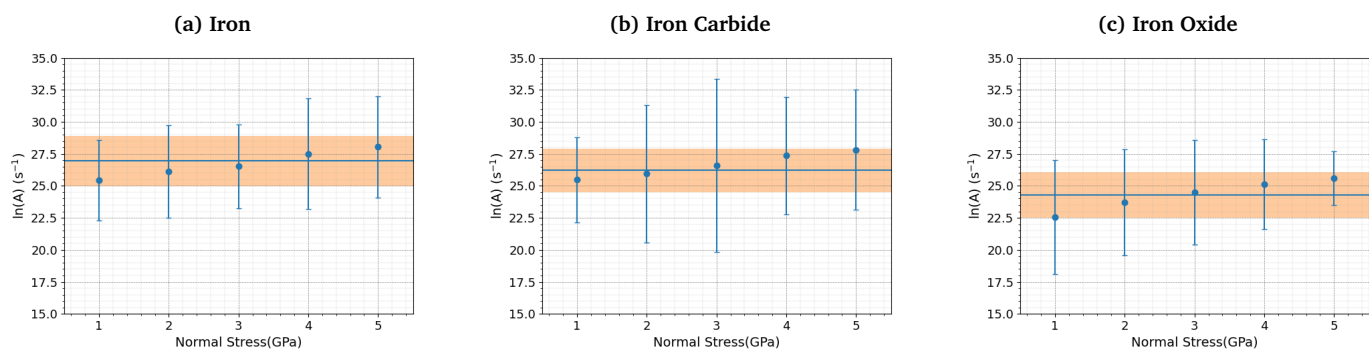

**Figure S11** Pressure dependence of  $\ln(A)$  for a)  $\alpha$ -Fe(110), b)  $\text{Fe}_3\text{C}(010)$ , and c)  $\text{Fe}_3\text{O}_4(001)$ . Blue points are from the 2D fits, orange are from the 3D fits. Vertical bars indicate 95 % confidence intervals.

|              | $\Delta V^*$ ( $\text{\AA}^3$ ) |                |                |                |                |                |
|--------------|---------------------------------|----------------|----------------|----------------|----------------|----------------|
|              | 400 K                           | 500 K          | 600 K          | 700 K          | 800 K          | 900 K          |
| Iron         | $4.9 \pm 1.7$                   | $6.2 \pm 4.2$  | $10.0 \pm 6.2$ | $11.0 \pm 1.9$ | $11.7 \pm 4.7$ | $17.4 \pm 8.4$ |
| Iron Carbide | $6.8 \pm 4.2$                   | $5.5 \pm 3.1$  | $10.3 \pm 4.6$ | $8.3 \pm 4.6$  | $12.8 \pm 4.0$ | $15.2 \pm 2.3$ |
| Iron Oxide   | $8.3 \pm 4.5$                   | $10.9 \pm 4.3$ | $12.0 \pm 4.8$ | $12.6 \pm 3.8$ | $17.7 \pm 5.6$ | $12.8 \pm 6.6$ |

**Table S4**  $\Delta V^*$  for TCP between  $\alpha$ -Fe(110),  $\text{Fe}_3\text{C}(010)$ , and  $\text{Fe}_3\text{O}_4(001)$  surfaces.

|              | $E_a$ ( $\text{kJ mol}^{-1}$ ) |                |                |                |                |
|--------------|--------------------------------|----------------|----------------|----------------|----------------|
|              | 1 GPa                          | 2 GPa          | 3 GPa          | 4 GPa          | 5 GPa          |
| Iron         | $20.6 \pm 5.5$                 | $21.1 \pm 6.2$ | $22.2 \pm 5.7$ | $23.7 \pm 7.1$ | $24.0 \pm 6.6$ |
| Iron Carbide | $19.7 \pm 5.8$                 | $20.7 \pm 8.1$ | $21.5 \pm 9.2$ | $23.0 \pm 7.3$ | $24.3 \pm 7.4$ |
| Iron Oxide   | $10.4 \pm 7.2$                 | $13.2 \pm 6.9$ | $14.1 \pm 6.8$ | $15.8 \pm 6.1$ | $19.4 \pm 3.6$ |

**Table S5**  $E_a$  for TCP between  $\alpha$ -Fe(110),  $\text{Fe}_3\text{C}(010)$ , and  $\text{Fe}_3\text{O}_4(001)$  surfaces.

|              | $\ln(A)(\text{s}^{-1})$ |                |                |                |                |
|--------------|-------------------------|----------------|----------------|----------------|----------------|
|              | 1 GPa                   | 2 GPa          | 3 GPa          | 4 GPa          | 5 GPa          |
| Iron         | $25.4 \pm 3.1$          | $26.1 \pm 3.6$ | $26.5 \pm 3.3$ | $27.5 \pm 4.3$ | $28.0 \pm 3.9$ |
| Iron Carbide | $25.4 \pm 3.3$          | $26.0 \pm 5.4$ | $26.6 \pm 6.7$ | $27.4 \pm 4.6$ | $27.8 \pm 4.7$ |
| Iron Oxide   | $22.6 \pm 4.5$          | $23.7 \pm 4.1$ | $24.5 \pm 4.1$ | $25.1 \pm 3.5$ | $25.6 \pm 2.1$ |

**Table S6**  $\ln(A)$  for TCP between  $\alpha$ -Fe(110),  $\text{Fe}_3\text{C}(010)$ , and  $\text{Fe}_3\text{O}_4(001)$  surfaces.



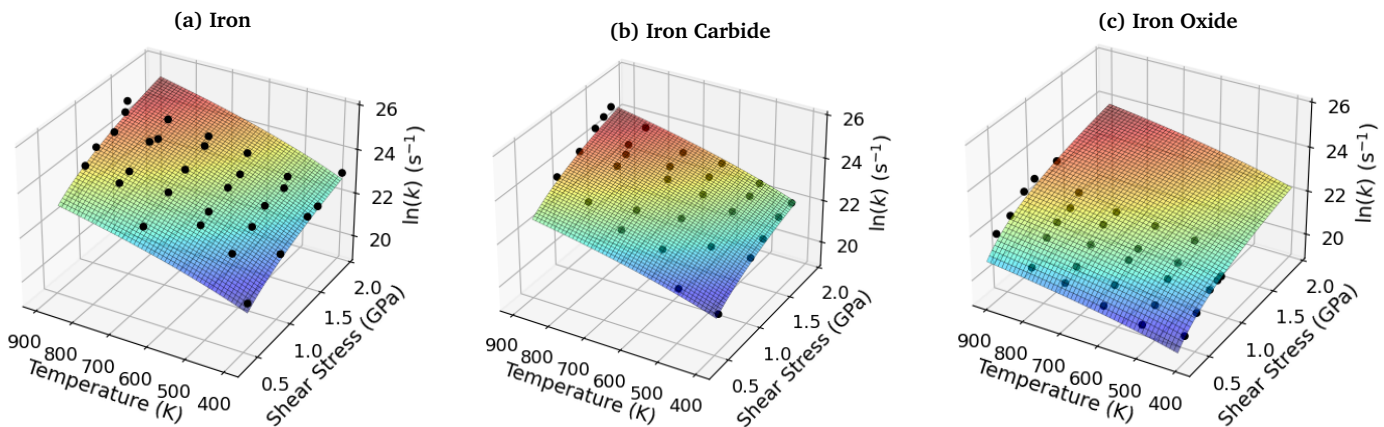

**Figure S12** 3D fits of TCP decomposition  $\ln(k)$  as a function of temperature and shear stress for a)  $\alpha$ -Fe(110), b)  $\text{Fe}_3\text{C}(010)$  and c)  $\text{Fe}_3\text{O}_4(100)$  surfaces.
